# Supplementary material for: Simultaneous measurement of neurite and neural body mass accumulationviaquantitative phase imaging
Source: Royal Society of Chemistry journal article supplement (doi:10.1039/d0an01961e), 2020-12-21
Supplement: d0an01961e3.pdf [file d0an01961e3.pdf]

## Simultaneous measurement of neurite and neural body mass accumulation via quantitative phase imaging

Soorya Pradeep<sup>a</sup>, Tasmia Tasnim<sup>a</sup>, Huanan Zhang<sup>a</sup>, and Thomas A. Zangle<sup>a,b\*</sup>

a. Department of Chemical Engineering, b. Huntsman Cancer Institute, University of Utah

\*tzangle@chemeng.utah.edu

### Electronic supplementary information

**Datasets:** Data and MATLAB files for recreating figures and analysis are publicly available at [https://figshare.com/projects/Neuron\\_QPI/94091](https://figshare.com/projects/Neuron_QPI/94091), doi:10.6084/m9.figshare.13372316

**Movie M1:** QPI data of neurons over time showing soma and neurites during 5 d differentiation

**Movie M2:** Neurite-filtered QPI data showing neurite dynamics and growth during 5 d differentiation

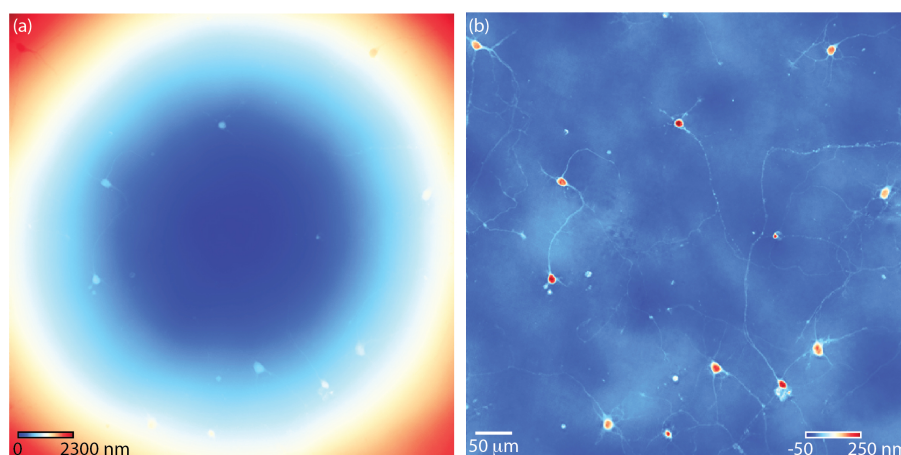

**Figure S1.** (a) Raw QWSLI phase shift data and (b) phase data (same as **Figure 3a**) after initial cell segmentation and fourth order polynomial surface background correction.

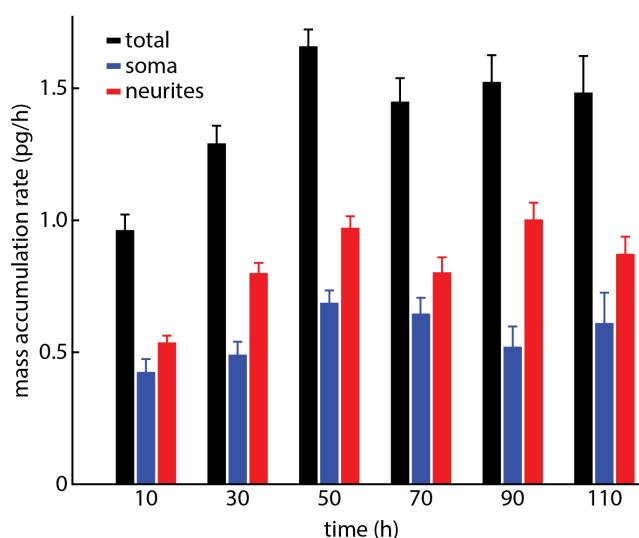

**Figure S2.** Absolute mass accumulation rates of total mass, soma mass, and neurite mass over 20 h periods. Error bars show standard error of the mean.

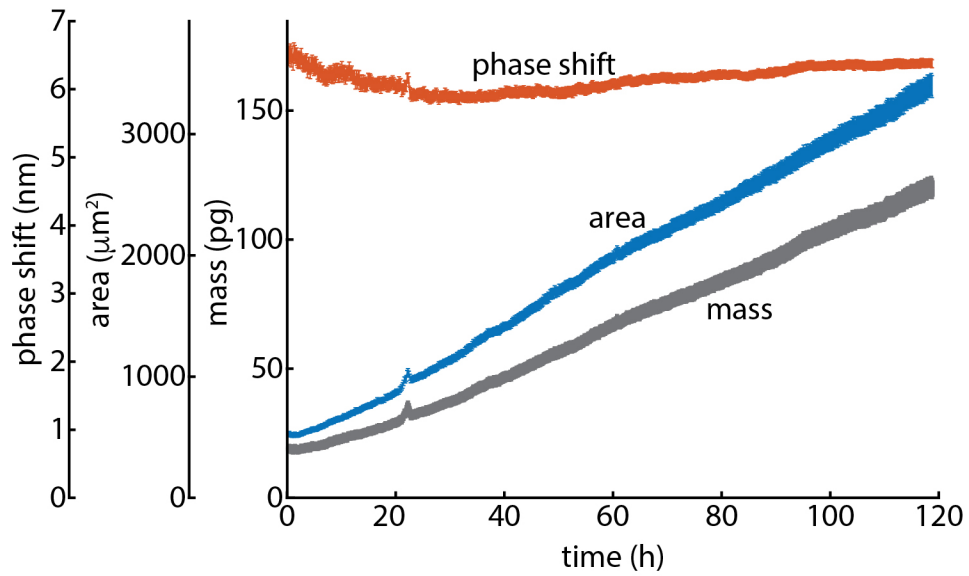

**Figure S3.** Neurite average phase shift (red), area (blue) and mass (gray) as a function of time. Average phase shift decreases over time for the first 30 h before the overall average increases due to neurite maturation. Area and mass are normalized per soma in each image. Error bars show standard error of the mean.
